# Supplementary material for: VHL mutations predict survival of patients with renal cell carcinoma in response to the therapy of immune checkpoint inhibitors
Source: Research Square preprint supplement (doi:10.21203/rs.3.rs-1291945/v1), 2022-02-01
Supplement: Supplementary file 1 [file 5f435d6c99b4c240185373fd.docx]

| **Supplemental Table 1**. Gene mutations significantly associated with overall survival of patients with mRCC in univariate analysis | | | | | | | |
| --- | --- | --- | --- | --- | --- | --- | --- |
|
| **Genes** | **Hazards ratio** | **95% CI** | **Mutation**  **frequency** | **Mutation rate** | ***P* value** | **FDR** | | |
| *JUN* | 0.05 | 0.01-0.25 | 1 | 0.006622517 | 0 | 0 | | |
| *TMEM127* | 0.05 | 0.01-0.25 | 1 | 0.006622517 | 0 | 0 | | |
| *VHL* | 1.91 | 1.31-2.79 | 106 | **0.701986755** | 0.001 | 0.007 | | |
| *FH* | 0.1 | 0.02-0.44 | 1 | 0.006622517 | 0.002 | 0.0084 | | |
| *IGF1R* | 0.1 | 0.02-0.44 | 1 | 0.006622517 | 0.002 | 0.0084 | | |
| *B2M* | 0.14 | 0.03-0.6 | 1 | 0.006622517 | 0.008 | 0.021 | | |
| *DAXX* | 0.14 | 0.03-0.6 | 1 | 0.006622517 | 0.008 | 0.021 | | |
| *ERG* | 0.14 | 0.03-0.6 | 1 | 0.006622517 | 0.008 | 0.021 | | |
| *ERBB4* | 0.28 | 0.1-0.78 | 2 | 0.013245033 | 0.015 | 0.0238 | | |
| *CIC* | 0.17 | 0.04-0.73 | 1 | 0.006622517 | 0.017 | 0.0238 | | |
| *CXCR4* | 0.17 | 0.04-0.73 | 1 | 0.006622517 | 0.017 | 0.0238 | | |
| *GPS2* | 0.17 | 0.04-0.73 | 1 | 0.006622517 | 0.017 | 0.0238 | | |
| *GRIN2A* | 0.17 | 0.04-0.73 | 1 | 0.006622517 | 0.017 | 0.0238 | | |
| *HNF1A* | 0.17 | 0.04-0.73 | 1 | 0.006622517 | 0.017 | 0.0238 | | |
| *RPS6KA4* | 0.17 | 0.04-0.73 | 1 | 0.006622517 | 0.017 | 0.0238 | | |
| *AXL* | 0.3 | 0.11-0.84 | 2 | 0.013245033 | 0.021 | 0.0276 | | |
| *AKT3* | 0.2 | 0.05-0.83 | 1 | 0.006622517 | 0.027 | 0.0298 | | |
| *MEN1* | 0.2 | 0.05-0.83 | 1 | 0.006622517 | 0.027 | 0.0298 | | |
| *NTRK3* | 0.2 | 0.05-0.83 | 1 | 0.006622517 | 0.027 | 0.0298 | | |
| *FOXP1* | 0.23 | 0.06-0.95 | 1 | 0.006622517 | 0.043 | 0.043 | | |
| *KDM5A* | 0.23 | 0.06-0.95 | 1 | 0.006622517 | 0.043 | 0.043 | | |
| Abbreviations: mRCC, metastatic renal cell carcinoma; FDR, False discovery rate; CI, confidence interval. | | | | | | |

| **Supplemental Table 2**. Clinicopathological features of ccRCC patients and *VHL* mutation status in the TCGA KIRC dataset | | | |
| --- | --- | --- | --- |
| Characteristics | No. of Cases (%) | | *P* value |
|  | VHL mutation | VHL wildtype | |
| All subjects | 225 (100) | 226 (100) |  |
| Mean of age ± SD | 61.36 ± 12.08 | 59.73 ± 12.06 | 0.152 |
| Sex |  |  | 0.741 |
| Male | 144 (64.0) | 149 (65.9) |  |
| Female | 81 (36.0) | 77 (34.1) |  |
| Neoplasm histologic grade | |  | 0.520 |
| G1-2 | 99 (44.0) | 99 (43.8) |  |
| G3-4 | 125 (55.6) | 123 (54.3) |  |
| Gx | 1 (0.4) | 4 (1.7) |  |
| Pathologic T Stage |  |  | 0.459 |
| T1-2 | 144 (64.0) | 136 (60.2) |  |
| T3-4 | 81 (36.0) | 90 (39.8) |  |
| Pathologic N Stage |  |  | 0.511 |
| N0 | 100 (44.4) | 108 (47.8) |  |
| N1 | 6 (2.7) | 9 (4.0) |  |
| Nx | 119 (52.9) | 109 (48.2) |  |
| Pathologic M Stage |  |  | 0.250 |
| M0 | 195 (86.7) | 186 (82.3) |  |
| M1 | 30 (13.3) | 40 (17.7) |  |
| Pathologic TNM Stage | |  | 0.290 |
| Stage I | 118 (52.4) | 100 (44.2) |  |
| Stage II | 21 (9.3) | 25 (11.1) |  |
| Stage III | 55 (24.4) | 59 (26.1) |  |
| Stage IV | 30 (13.3) | 42 (18.6) |  |
| NA | 1 (0.4) | 0 (0.0) |  |
| Abbreviations: TCGA KIRC; The Cancer Genome Atlas Kidney Renal Clear Cell Carcinoma; ccRCC, clear cell renal cell carcinoma; SD, standard deviation; NA, not available. | | | |

| **Supplemental Table 3.** Tumor infiltration immune cells associated with the *VHL* mutation status in patients with ccRCC from the TCGA KIRC Provisional dataset | | | |
| --- | --- | --- | --- |
|
| **Immune cell type** | **Fold Change** | ***P* value** | **FDR** |
| Macrophages M0 | 0.986763077 | 0.007703189 | 0.169470169 |
| Neutrophils | 0.997028881 | 0.077160934 | 0.473714398 |
| NK cells activated | 0.997283935 | 0.054106513 | 0.473714398 |
| Mast cells resting | 0.998205528 | 0.55233627 | 0.810093196 |
| Dendritic cells activated | 0.998600883 | 0.086129891 | 0.473714398 |
| Dendritic cells resting | 0.999150026 | 0.442186318 | 0.801913633 |
| T cells regulatory (Tregs) | 0.999158846 | 0.65492112 | 0.832827597 |
| B cells memory | 0.999250211 | 0.193449003 | 0.70441424 |
| Mast cells activated | 0.999303504 | 0.224131804 | 0.70441424 |
| T cells CD4 memory activated | 0.999921689 | 0.794971797 | 0.832827597 |
| T cells CD4 naive | 0.999970334 | 0.473858056 | 0.801913633 |
| Eosinophils | 1.00006599 | 0.768252523 | 0.832827597 |
| T cells gamma delta | 1.000300821 | 0.773786174 | 0.832827597 |
| Plasma cells | 1.000722704 | 0.773966725 | 0.832827597 |
| T cells follicular helper | 1.001124259 | 0.520393702 | 0.810093196 |
| Macrophages M2 | 1.001292586 | 0.850929861 | 0.850929861 |
| T cells CD4 memory resting | 1.001888989 | 0.747979953 | 0.832827597 |
| Macrophages M1 | 1.002253641 | 0.372315154 | 0.744630307 |
| B cells naive | 1.002417576 | 0.342458448 | 0.744630307 |
| Monocytes | 1.002737734 | 0.348033671 | 0.744630307 |
| NK cells resting | 1.003539594 | 0.133542118 | 0.58758532 |
| T cells CD8 | 1.009182524 | 0.279648464 | 0.744630307 |
| Abbreviations: TCGA KIRC; The Cancer Genome Atlas Kidney Renal Clear Cell Carcinoma; ccRCC, clear cell renal cell carcinoma; FDR, False dicovery rate. | | | |
|
